# Supplementary material for: Regulation of excited-state properties of dibenzothiophene-based fluorophores for realizing efficient deep-blue and HLCT-sensitized OLEDs
Source: Royal Society of Chemistry journal article supplement (doi:10.1039/d2qm01008a), 2022-11-05
Supplement: d2qm01008a1.pdf [file d2qm01008a1.pdf]

## Supporting Information

### Regulation of Excited-State Properties of Dibenzothiophene-Based Fluorophores for Realizing Efficient Deep-Blue and HLCT- Sensitized OLEDs

Jichen Lv<sup>a</sup>, Yumiao Huo<sup>d</sup>, Shu Xiao<sup>b</sup>, Zhennan Zhao<sup>c</sup>, Ling Peng<sup>a</sup>, Yuchao Liu<sup>a</sup>, Zhongjie Ren<sup>c</sup>,  
Dongge Ma<sup>b</sup>, Shian Ying<sup>a, b\*</sup> and Shouke Yan<sup>a, c\*</sup>

<sup>a</sup> Key Laboratory of Rubber-Plastics, Ministry of Education, Qingdao University of Science & Technology, Qingdao 266042, P. R. China.

<sup>b</sup> Institute of Polymer Optoelectronic Materials and Devices, State Key Laboratory of Luminescent Materials and Devices, South China University of Technology, Guangzhou 510640, P. R. China.

<sup>c</sup> State Key Laboratory of Chemical Resource Engineering, College of Materials Science and Engineering, Beijing University of Chemical Technology, Beijing 100029, P. R. China.

<sup>d</sup> College of Materials Science and Engineering, Shandong University of Science and Technology, Qingdao 266590, P. R. China.

\*Corresponding author: [shian0610@126.com](mailto:shian0610@126.com); [skyan@mail.buct.edu.cn](mailto:skyan@mail.buct.edu.cn)

## 1. EXPERIMENTAL METHODS

### 1.1. Experimental measurements

$^1\text{H}$  and  $^{13}\text{C}$  nuclear magnetic resonance (NMR) spectra were performed by the Bruker AC500 spectrometer at 500 MHz and 125 MHz with  $\text{CDCl}_3$  and tetramethylsilane (TMS) as the solvent and internal standard, respectively. Mass spectra of compound were measured by High Resolution Quadrupole Time of Flight Tandem Mass Spectrometer (TOF-MS). UV-visible absorption and emission spectra were carried out by using Hitachi U-4100 absorption spectrometer and Hitachi F-4600 spectrophotometer, respectively. Photoluminescence quantum yields (PLQYs) of materials in solution and film were estimated by using the integration sphere setup (Hamamatsu C11347-11) equipped with a xenon high-pressure lamp and a multichannel analyzer from 200 to 950 nm. Phosphorescence spectra of materials were measured at 77 K in dichloromethane solution after delay time of 1 ms by the Edinburgh FLS-980 with an EPL-340 optical laser. Thermogravimetric analysis (TGA) curves of materials were performed using a Netzsch (209F1) thermogravimetric analyzer under a nitrogen atmosphere ( $50 \text{ mL min}^{-1}$ ) at a heating rate of  $10 \text{ }^\circ\text{C min}^{-1}$ . Differential scanning calorimetry (DSC) curves of target compounds were recorded by a Netzsch DSC (204F1) instrument at a heating (or cooling) rate of  $10 \text{ }^\circ\text{C min}^{-1}$ . The highest occupied molecular orbital (HOMO) energy levels of target compound were measured on a CHI760D electrochemical workstation by using cyclic voltammetry (CV) with a glass carbon disk as the working electrode, a platinum wire as the counter electrode, a  $\text{Ag}/\text{Ag}^+$  (0.01 M of  $\text{AgNO}_3$  in acetonitrile) as the reference electrode, and ferrocene as the standard reference. The material was dissolved in anhydrous dichloromethane solution with 0.1 mol/L  $\text{Bu}_4\text{NPF}_6$  as the electrolyte to measure the oxidation, from which the HOMO energy level was estimated, whereas the lowest unoccupied molecular orbital (LUMO) energy levels were calculated by the difference between the band gap ( $E_g$ ) evaluated from the onset of absorption spectra and HOMO energy level.

### 1.2. Device fabrication and measurement

Patterned indium-tin-oxide (ITO) glasses (Purchased from KINTEC Company, Hong Kong.)

with a sheet resistance of 20  $\Omega$  per square were ultrasonically treated in detergents and deionized water, then dried for 30 mins at 120 °C. After treated by oxygen plasma for 7 mins, Clean ITO substrates were transferred into the vacuum deposition system. When the pressure is less than  $2 \times 10^{-4}$  Pa, the devices were fabricated. The evaporation rates of organic materials, lithium fluoride (LiF) and aluminum (Al) were 1-1.5, 0.2 and 5-10  $\text{\AA s}^{-1}$  via a shadow mask, which were detected by a frequency counter and calibrated by a Dektak 6 M profiler (Veeco). The emitting area of the devices was determined by the overlap between ITO and Al electrodes. The current density–luminance–voltage characteristics were performed by the computer controlled Keithley 2450 Series Digital Source-meter and LS160 Luminancemeter (KONICAMINOLTA). EL spectra at different voltages were recorded by the optical analyzer FLAME-S-VIS-NIR photometer. Supposing the light emitted by OLEDs accorded with the Lambertian distribution, the EQEs can be calculated from the EL spectra, luminance, and current density.

### 1.3 Theoretical calculations

All the density functional theory (DFT) and time dependent DFT (TDDFT) calculations were carried out using Gaussian 09 package. The optimized ground-state geometries, energy levels, and frontier molecular orbital (FMO) distributions were calculated on the basis of DFT by using RB3LYP/6-31G(d, p) method. According to the TDDFT calculation, the optimized excited-state geometries, natural transition orbitals (NTOs), singlet and triplet state energies, and oscillator strength were performed by the RB3LYP/6-31G (d, p) level, and processed by Multiwfn.<sup>1</sup> Using the respective  $T_n$  geometries, spin–orbit coupling (SOC) matrix elements,  $\langle S_1 | \hat{H}_{SOC} | T_n \rangle$ , were calculated using a scalar relativistic TDDFT.

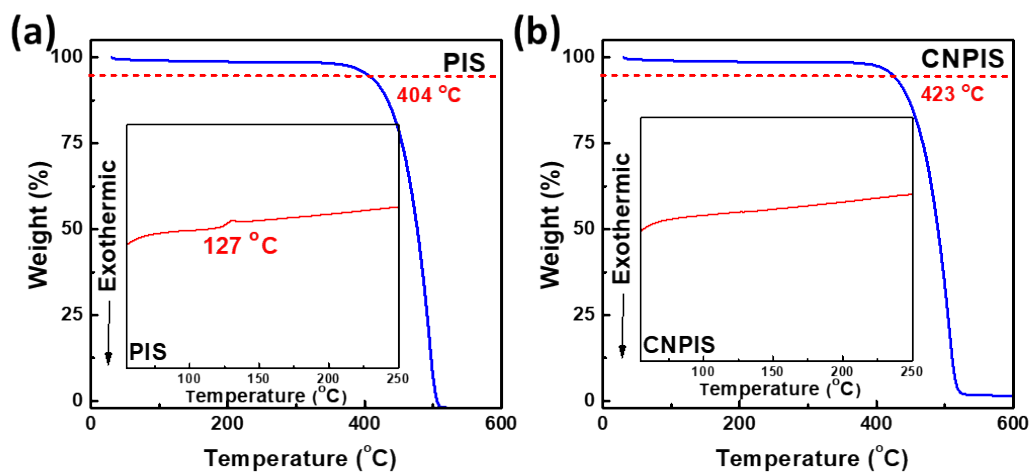

Figure S1. TGA thermograms of PIS (a) and CNPIS (b). Insert: DSC curves of PIS and CNPIS.

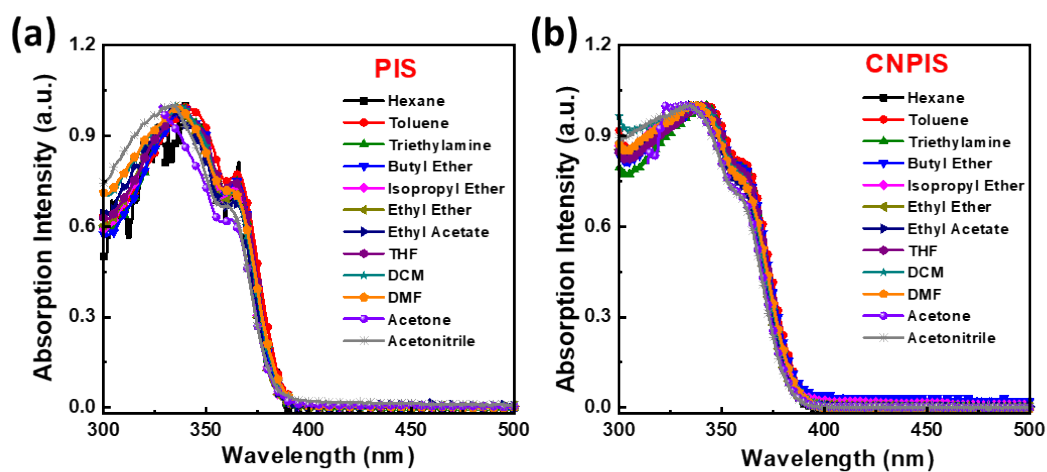

Figure S2. UV-vis absorption spectra of PIS and CNPIS in different solvents (10  $\mu$ M) at room temperature.

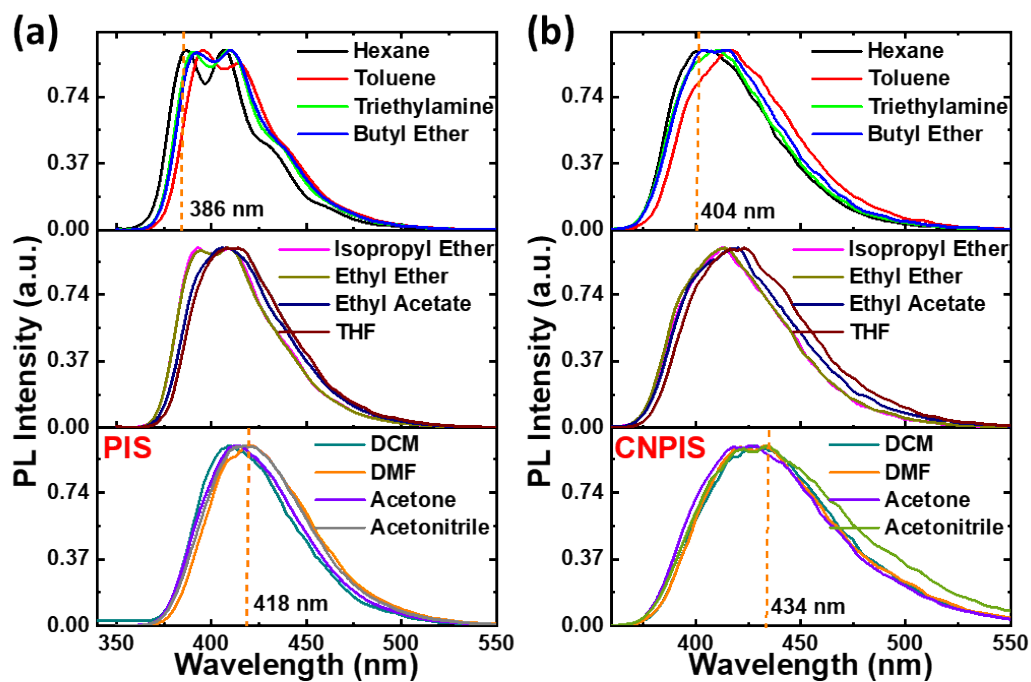

**Figure S3.** PL spectra of PIS and CNPIS in different solvents (10  $\mu\text{M}$ ) at room temperature.

**Table S1.** The detailed absorption and emission data of PIS in different solvents.

| Solvents          | $\epsilon$ | $n$   | $f(\epsilon, n)$ | $\lambda_a$ [nm] | $\lambda_f$ [nm] | $\nu_a - \nu_f$ [ $\text{cm}^{-1}$ ] |
|-------------------|------------|-------|------------------|------------------|------------------|--------------------------------------|
| Hexane            | 1.9        | 1.375 | 0.0012           | 342              | 386              | 3333.03                              |
| Toluene           | 2.38       | 1.494 | 0.013            | 342              | 395              | 3923.31                              |
| Triethylamine     | 2.42       | 1.401 | 0.048            | 337              | 390              | 4032.56                              |
| Butyl ether       | 3.08       | 1.399 | 0.096            | 337              | 392              | 4163.39                              |
| Isopropyl ether   | 3.88       | 1.368 | 0.145            | 336              | 393              | 4316.61                              |
| Ethyl ether       | 4.34       | 1.352 | 0.167            | 336              | 395              | 4445.45                              |
| Ethyl acetate     | 6.02       | 1.372 | 0.2              | 333              | 405              | 5338.67                              |
| Tetrahydrofuran   | 7.58       | 1.407 | 0.21             | 337              | 408              | 5163.79                              |
| Dichloromethane   | 8.93       | 1.424 | 0.217            | 336              | 409              | 5312.03                              |
| Dimethylformamide | 37         | 1.427 | 0.276            | 337              | 422              | 5976.91                              |
| Acetone           | 20.7       | 1.359 | 0.284            | 332              | 416              | 6082.02                              |
| Acetonitrile      | 37.5       | 1.344 | 0.305            | 328              | 418              | 6564.36                              |

**Table S2.** The detailed absorption and emission data of CNPIS in different solvents.

| Solvents          | $\epsilon$ | $n$   | $f(\epsilon, n)$ | $\lambda_a$ [nm] | $\lambda_f$ [nm] | $\nu_a - \nu_f$ [cm <sup>-1</sup> ] |
|-------------------|------------|-------|------------------|------------------|------------------|-------------------------------------|
| Hexane            | 1.9        | 1.375 | 0.0012           | 340              | 404              | 4659.29                             |
| Toluene           | 2.38       | 1.494 | 0.013            | 344              | 414              | 4915.18                             |
| Triethylamine     | 2.42       | 1.401 | 0.048            | 341              | 410              | 4935.27                             |
| Butyl ether       | 3.08       | 1.399 | 0.096            | 341              | 415              | 5229.13                             |
| Isopropyl ether   | 3.88       | 1.368 | 0.145            | 339              | 412              | 5226.68                             |
| Ethyl ether       | 4.34       | 1.352 | 0.167            | 337              | 414              | 5519.00                             |
| Ethyl acetate     | 6.02       | 1.372 | 0.2              | 336              | 420              | 5952.38                             |
| Tetrahydrofuran   | 7.58       | 1.407 | 0.21             | 340              | 423              | 5771.10                             |
| Dichloromethane   | 8.93       | 1.424 | 0.217            | 337              | 428              | 6309.10                             |
| Dimethylformamide | 37         | 1.427 | 0.276            | 337              | 432              | 6525.44                             |
| Acetone           | 20.7       | 1.359 | 0.284            | 333              | 426              | 6555.85                             |
| Acetonitrile      | 37.5       | 1.344 | 0.305            | 334              | 434              | 6898.65                             |

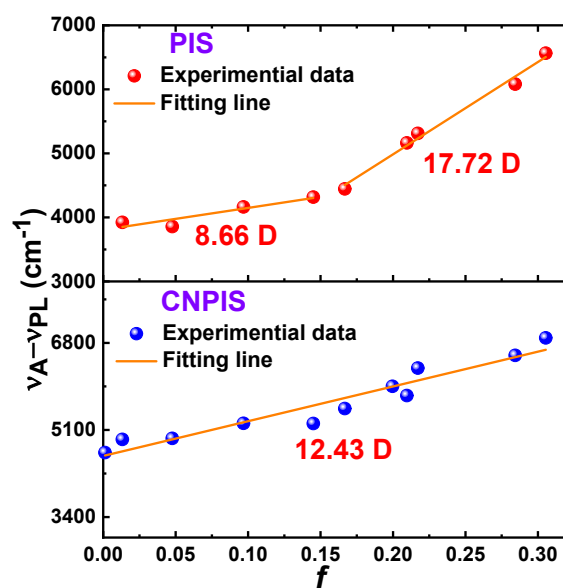**Figure S4.** Solvatochromic Lippert-Mataga models of PIS and CNPIS with the Stokes shift ( $\nu_a - \nu_{PL}$ ) as a function of solvent polarity ( $f$ ).

#### Detailed Lippert-Mataga Calculation

The Stokes shift ( $\nu_A - \nu_{PL}$ ) versus orientational polarizability ( $(\epsilon, n)$ ) of solvents can be constructed by the Lippert-Mataga model with the Equation 1 as below.

$$hc(v_A - v_{PL}) = hc(v_A^0 - v_{PL}^0) + \frac{2(\mu_e - \mu_g)^2}{a_0^3} f(\varepsilon, n) \quad (1)$$

Here,  $h$  is the Plank constant,  $c$  is the light speed in vacuum,  $\mu_g$  and  $\mu_e$  are the ground-state excited-state dipole moments,  $(\varepsilon, n)$  is the orientational polarizability of solvents,  $a_0$  is the Onsager cavity radius,  $v_A^0 - v_{PL}^0$  is the Stokes shifts when  $f$  is zero, respectively.

Take differential on both sides of the Equation 1, the Equation 2 can be obtained:

$$\mu_e = \mu_g + \left\{ \frac{hca_0^3}{2} \times \left[ \frac{d(v_A - v_{PL})}{df(\varepsilon, n)} \right] \right\}^{1/2} \quad (2)$$

$(\varepsilon, n)$  and  $a_0$  can be obtained by the Equation 3 and 4:

$$f(\varepsilon, n) = \frac{\varepsilon - 1}{2\varepsilon + 1} + \frac{n^2 - 1}{2n^2 + 1} \quad (3)$$

$$a_0 = \left( \frac{3M}{4\pi Nd} \right)^{1/3} \quad (4)$$

Where,  $\varepsilon$  and  $n$  are dielectric constant and refractive index of solvent,  $N$  is Avogadro's number,  $M$  is molar mass, and  $d$  is density of the solvents, respectively. The values of  $(\varepsilon, n)$  and  $a_0$  can be estimated by the Equation 3 and 4. The  $\mu_g^S$  of **PIS** and **CNPIS** (4.1426 and 1.1764 D) were estimated with the Gaussian 09 package at the level of B3LYP/6-31G(d, p). The  $\frac{d(v_A - v_{PL})}{df(\varepsilon, n)}$  can be estimated with the solvatochromic experiment data listed in Table S1 and S2. With the information above, **PIS** shows two section lines with the  $\mu_e$ s of 8.66 and 17.72 D in low- and high-polar solvents, while the well-fitted linear relationship with the  $\mu_e$  of 12.43 D was achieved based on **CNPIS**.

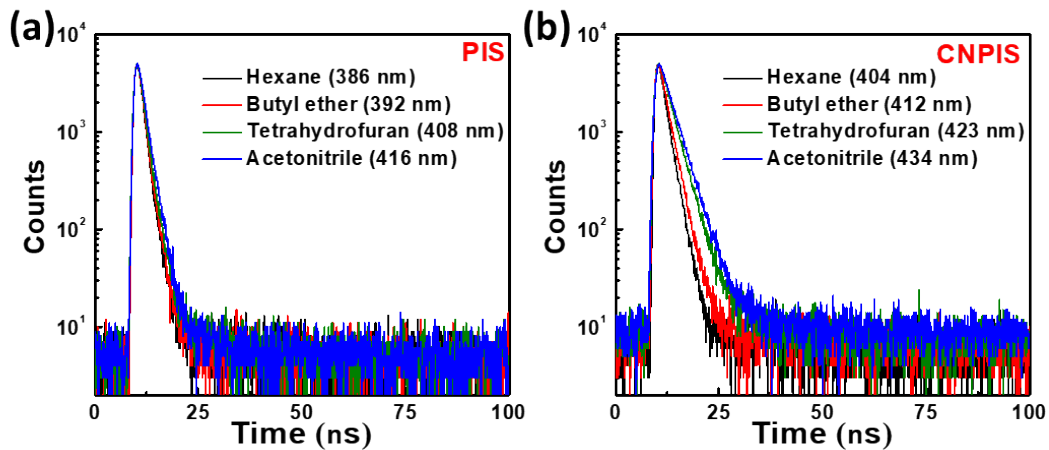

**Figure S5.** Transient PL decay spectra of **PIS** (a) and **CNPIS** (b) at hexane, butyl ether, tetrahydrofuran, and acetonitrile solutions (10  $\mu$ M).

**Table S3.** PLQYs, lifetimes, radiative transition rates ( $k_r$ ) and non-radiative transition rates ( $k_{nr}$ ) of PIS and CNPIS.

|                 | PIS   |             |                                     |                                        | CNPIS |             |                                     |                                        |
|-----------------|-------|-------------|-------------------------------------|----------------------------------------|-------|-------------|-------------------------------------|----------------------------------------|
|                 | PLQY  | $\tau$ [ns] | $k_r^a$ [ $\times 10^8$ s $^{-1}$ ] | $k_{nr}^b$ [ $\times 10^8$ s $^{-1}$ ] | PLQY  | $\tau$ [ns] | $k_r^a$ [ $\times 10^8$ s $^{-1}$ ] | $k_{nr}^b$ [ $\times 10^8$ s $^{-1}$ ] |
| Hexane          | 0.764 | 1.33        | 5.74                                | 1.77                                   | 0.450 | 1.74        | 2.59                                | 3.16                                   |
| Butyl ether     | 0.852 | 1.44        | 5.92                                | 1.03                                   | 0.447 | 2.10        | 2.13                                | 2.63                                   |
| Tetrahydrofuran | 0.858 | 1.65        | 5.20                                | 0.86                                   | 0.253 | 2.86        | 0.88                                | 2.61                                   |
| Acetonitrile    | 0.922 | 1.73        | 5.33                                | 0.45                                   | 0.062 | 3.16        | 0.20                                | 2.97                                   |
| Neat film       | 0.497 | 1.19        | 4.18                                | 4.23                                   | 0.304 | 2.26        | 1.34                                | 3.08                                   |

<sup>a</sup>  $k_r = \text{PLQY}/\tau$ ; <sup>b</sup>  $k_{nr} = 1/\tau - k_r$

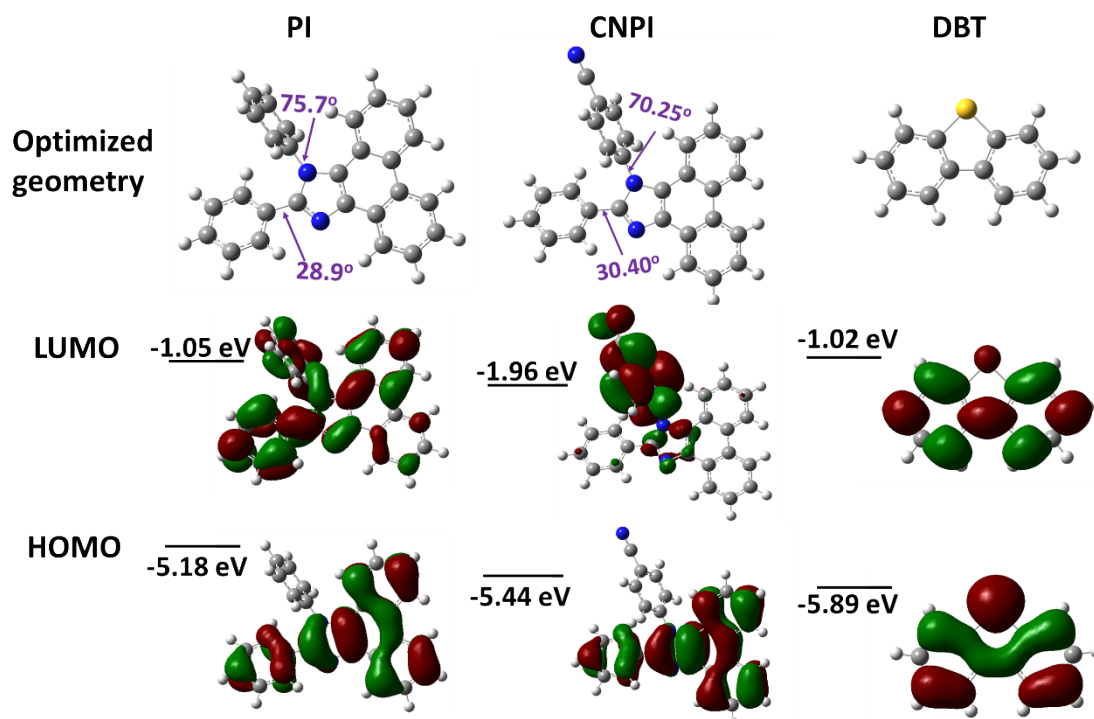

**Figure S6.** Optimized geometries and frontier molecular orbitals of the HOMO and LUMO of 1,2-diphenyl-1*H*-phenanthro[9,10-*d*]imidazole (PI), 4-(2-phenyl-1*H*-phenanthro[9,10-*d*]imidazol-1-yl)benzonitrile (CNPI), and dibenzothiophene (DBT), and their energy levels computed at the B3LYP/ 6-31G(d,p) level.



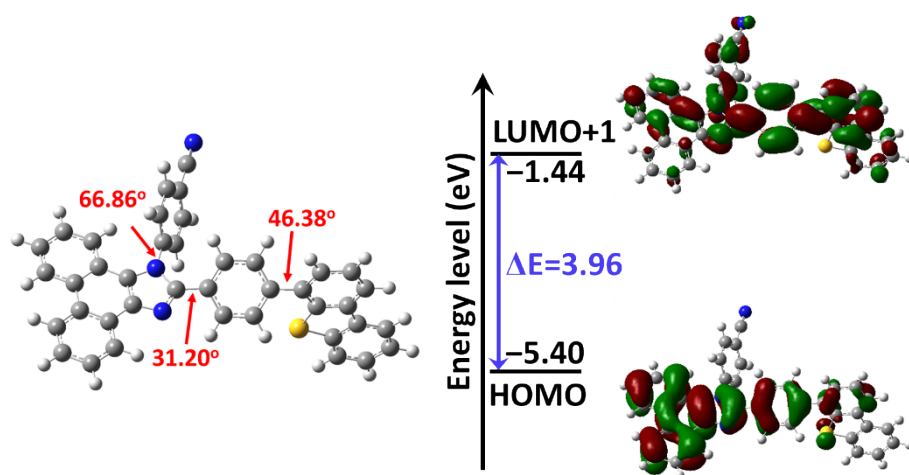

**Figure S7.** Optimized geometries and the HOMO and LUMO+1 distributions of CNPIS.

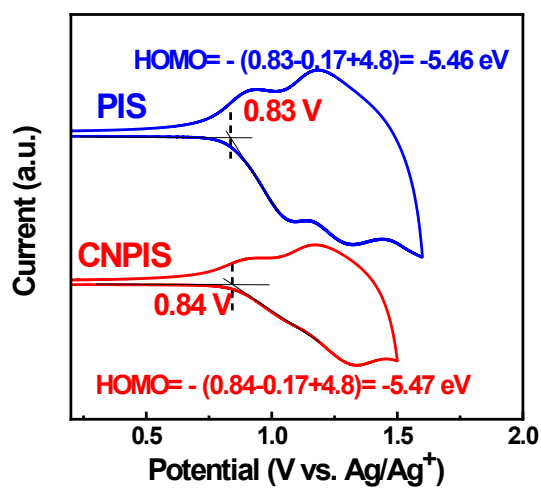

**Figure S8.** Cyclic voltammograms of PIS and CNPIS measured in anhydrous dichloromethane.

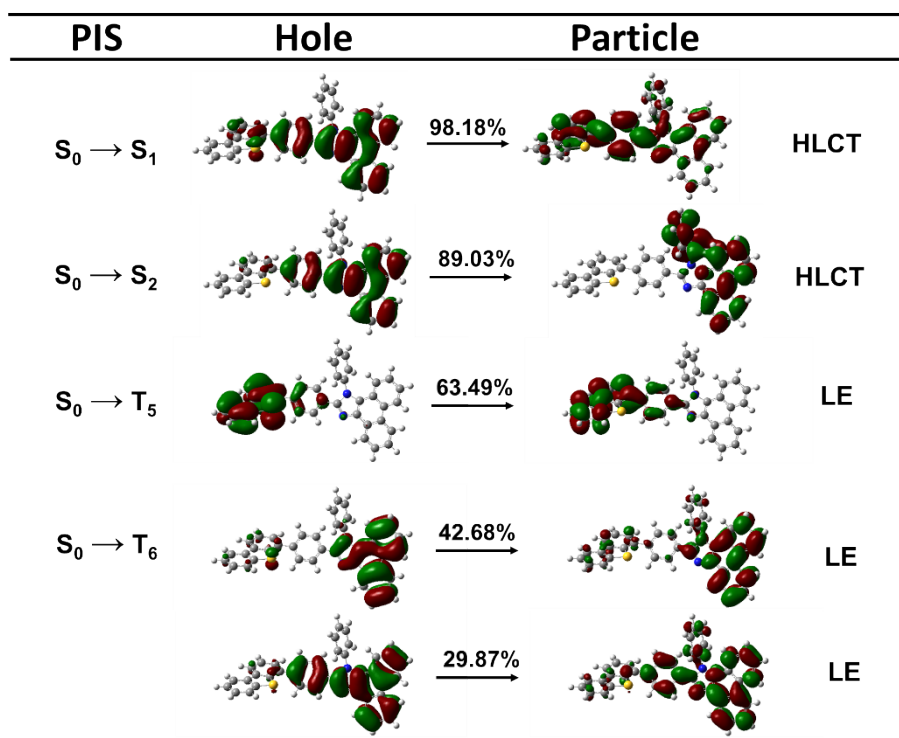

**Figure S9.** The calculated NTO distributions of singlet and triplet excited states ( $S_1$ ,  $S_2$ ,  $T_5$ , and  $T_6$ ) of PIS.

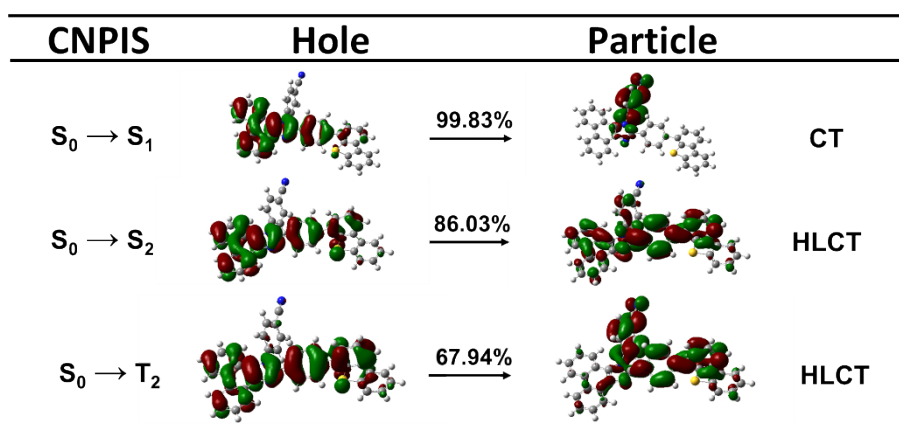

**Figure S10.** The calculated NTO distributions of singlet and triplet excited states ( $S_1$ ,  $S_2$ , and  $T_2$ ) of CNPIS.

**Table S4.** Energy levels of singlet and triplet states and oscillator strengths of singlet states of **PIS**.

| <b>Excited States</b> | <b>S energy level [eV]</b> | <b>T energy level [eV]</b> | <b>S Oscillator Strength</b> |
|-----------------------|----------------------------|----------------------------|------------------------------|
| 1                     | 3.4565                     | 2.6255                     | 0.8318                       |
| 2                     | 3.7186                     | 2.9631                     | 0.0117                       |
| 3                     | 3.837                      | 3.1542                     | 0.0105                       |
| 4                     | 3.9178                     | 3.3405                     | 0.0076                       |
| 5                     | 3.9493                     | 3.4184                     | 0.0015                       |
| 6                     | 3.9678                     | 3.5506                     | 0.1291                       |
| 7                     | 4.0963                     | 3.6761                     | 0.01                         |
| 8                     | 4.2093                     | 3.6899                     | 0.0842                       |
| 9                     | 4.256                      | 3.7907                     | 0.0201                       |
| 10                    | 4.417                      | 3.82                       | 0.0564                       |

**Table S5.** Energy levels of singlet and triplet states and oscillator strengths of singlet states of **CNPIS**.

| <b>Excited States</b> | <b>S energy level [eV]</b> | <b>T energy level [eV]</b> | <b>S Oscillator Strength</b> |
|-----------------------|----------------------------|----------------------------|------------------------------|
| 1                     | 2.9154                     | 2.5824                     | 0.0312                       |
| 2                     | 3.5303                     | 2.9392                     | 0.6285                       |
| 3                     | 3.5567                     | 3.0014                     | 0.0113                       |
| 4                     | 3.6031                     | 3.1732                     | 0.0459                       |
| 5                     | 3.6491                     | 3.2848                     | 0.1581                       |
| 6                     | 3.8606                     | 3.372                      | 0.0058                       |
| 7                     | 3.8878                     | 3.4166                     | 0.0106                       |
| 8                     | 3.9297                     | 3.5558                     | 0.0032                       |
| 9                     | 4.0321                     | 3.5806                     | 0.0315                       |
| 10                    | 4.1398                     | 3.5923                     | 0.0098                       |

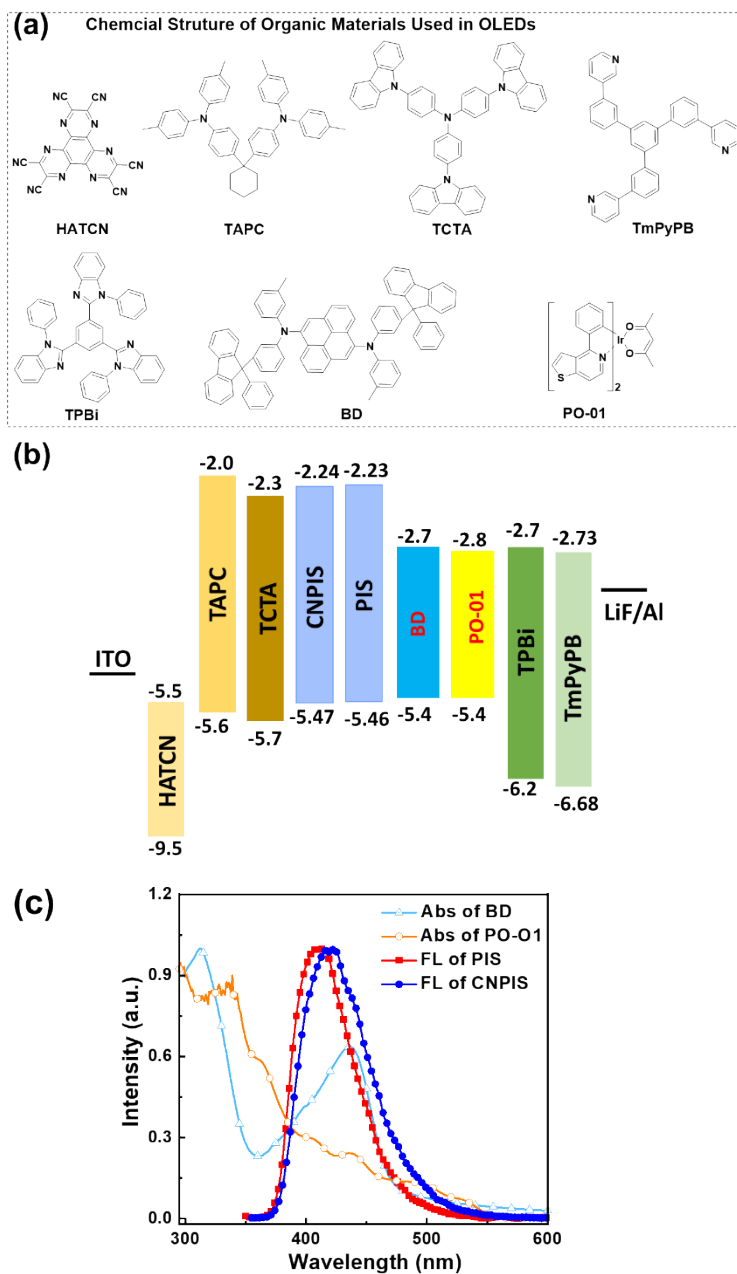

**Figure S11.** Chemical structures (a) and energy diagrams (b) of materials used in this work. (c) Ultraviolet-visible (UV-vis) absorption of materials **BD** and **PO-01**, and photoluminescence (PL) spectra of **PIS** and **CNPIS**.

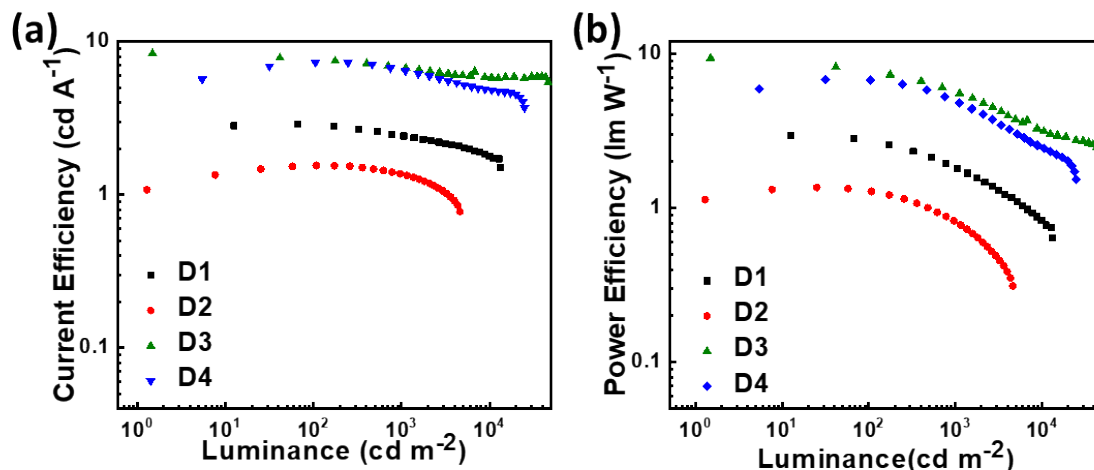

**Figure S12.** Current efficiency–luminance (a) and power efficiency–luminance (b) plots of the fabricated OLEDs (**D1**, **D2**, **D3**, and **D4**). The device structure is ITO/HATCN (10 nm)/TAPC (50 nm)/TCTA (10 nm)/ EML (20 nm)/TmPyPB (40 nm)/LiF (1 nm)/Al (100 nm), where EMLs are PIS, CNPIS, PIS: 3wt% BD, and CNPIS: 3wt% BD for **D1**, **D2**, **D3**, and **D4**, respectively.

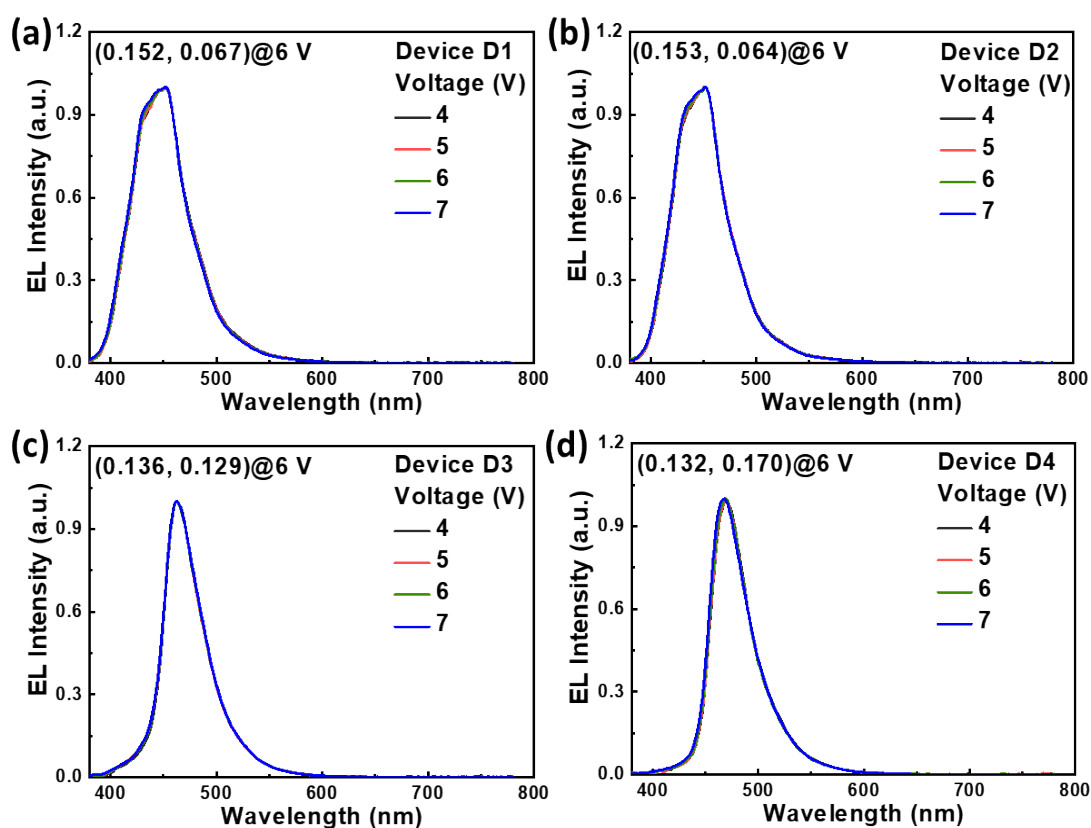

**Figure S13.** EL spectra at different applied voltages of the devices **D1** (a), **D2** (b), **D3** (c), and **D4** (d).

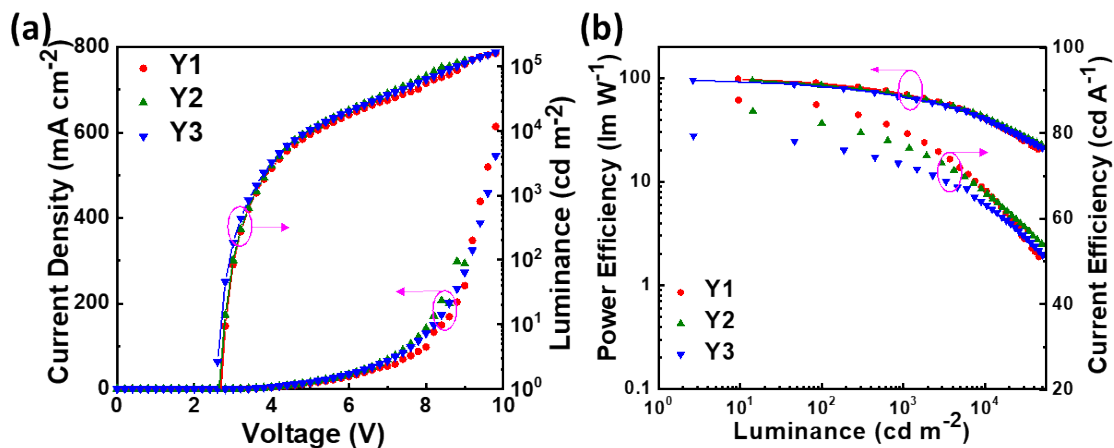

**Figure S14.** (a) Current-density–voltage–luminance characteristics of the orange OLEDs (Y1, Y2 and Y3). (b) Power efficiency and current efficiency versus luminance curves of the orange OLEDs (Y1, Y2 and Y3).

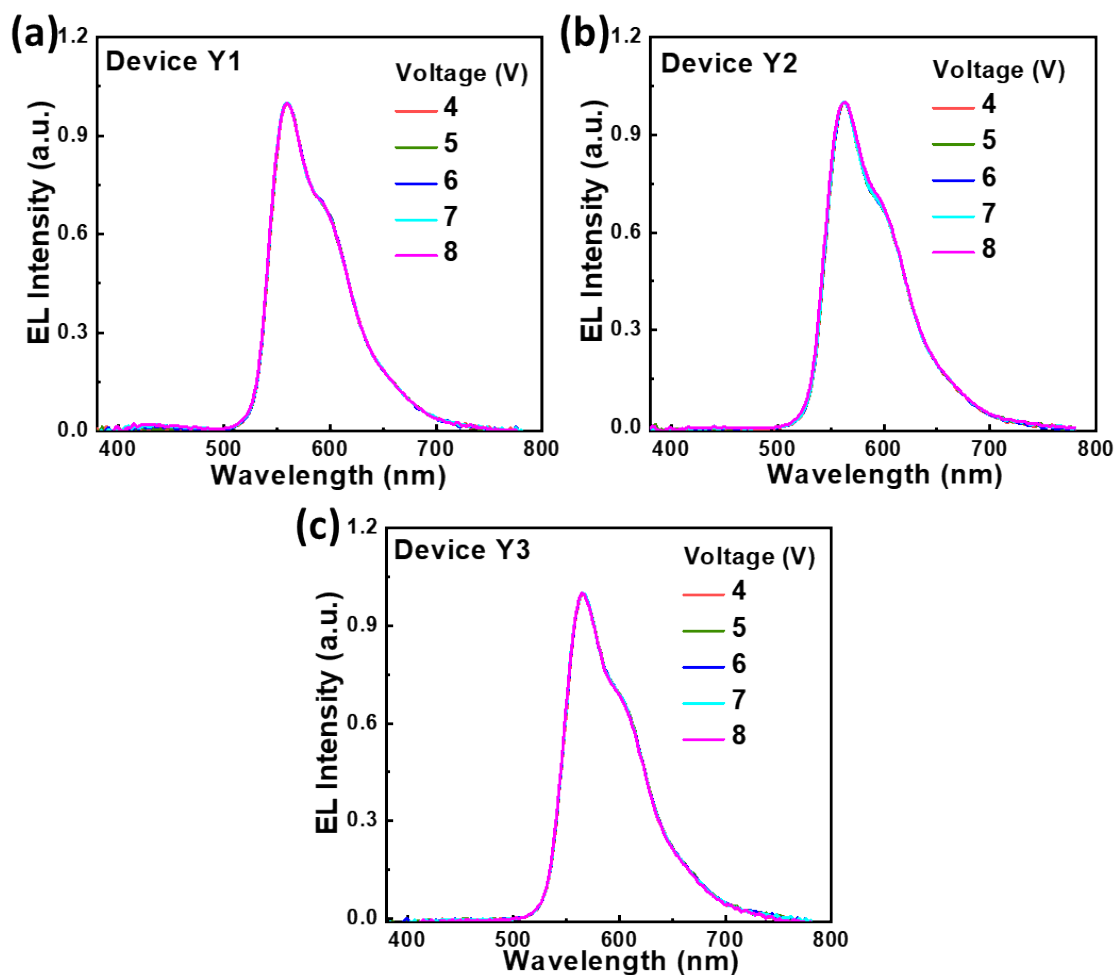

**Figure S15.** Normalized EL spectra at different applied voltages. (a) Yellow device Y1. (b) Yellow device Y2. (c) Yellow device Y3.

## References

1. T. Lu, F. Chen, Multiwfn: A multifunctional wavefunction analyzer, *J. Comput. Chem.*, 2012, **33**, 580-592.
